# Supplementary material
Source: ML conference proceedings conference paper supplement (https://openreview.net/forum?id=j4_YHiTAN63)

rep basis

0  
5  
10  
15

0

20

40

60

80

100

120

neuron basis

0.4  
0.2  
0  
-0.2  
-0.4

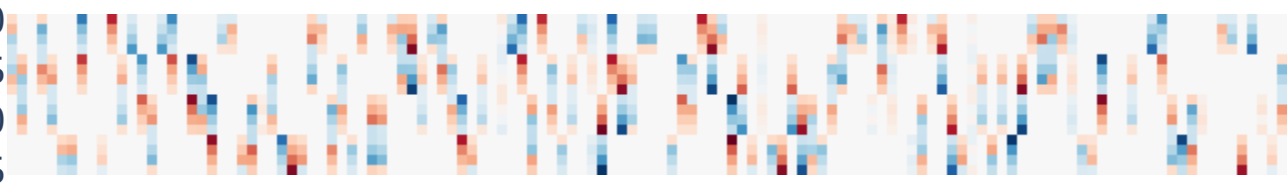

Supplement: supplementary_material [file attachment]

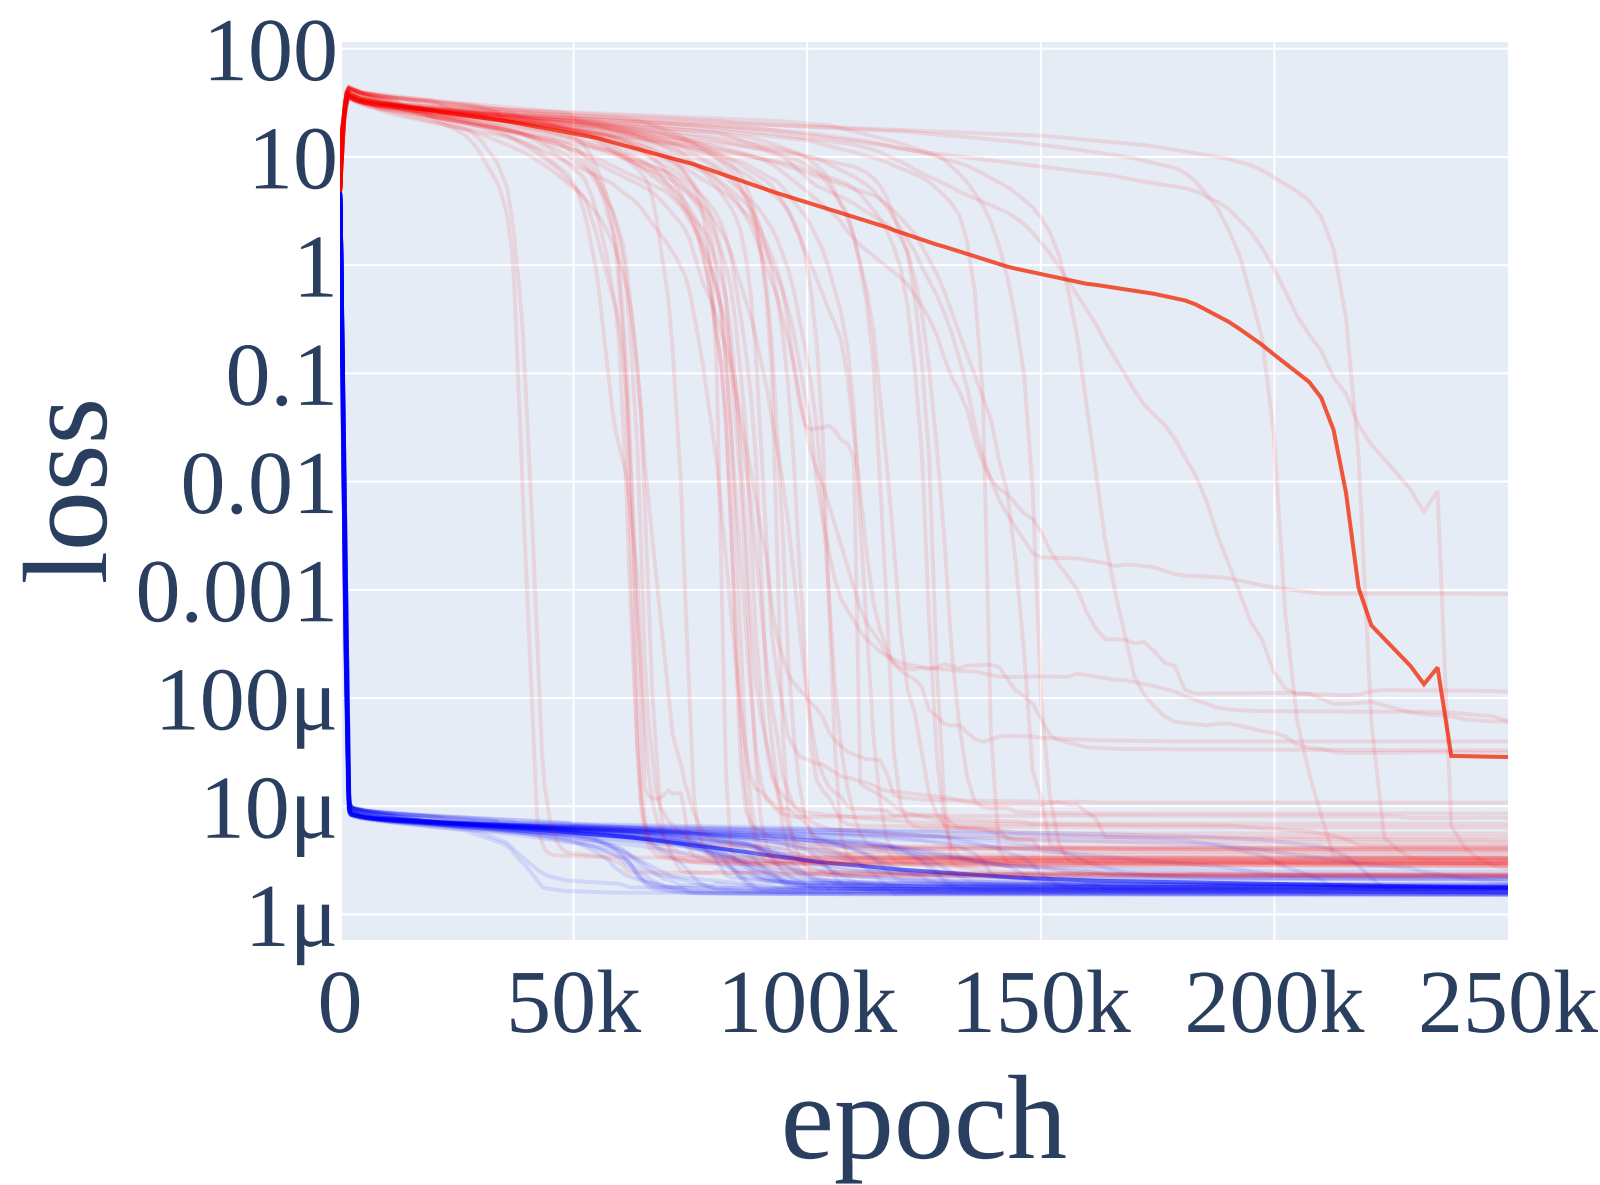

Supplement: supplementary_material [file attachment]

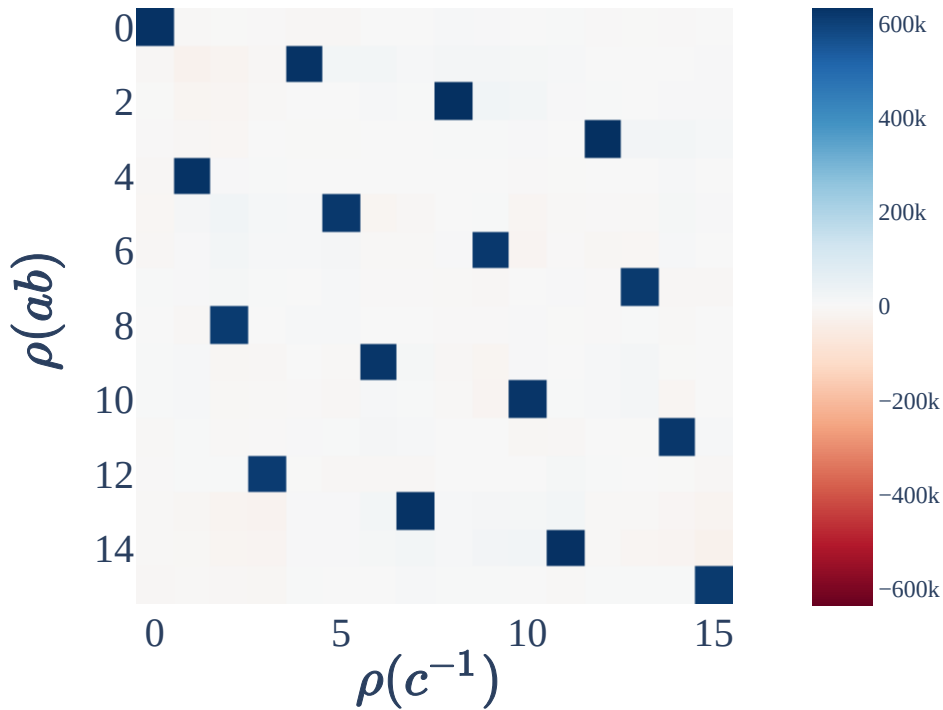

Supplement: supplementary_material [file attachment]

fraction of variance

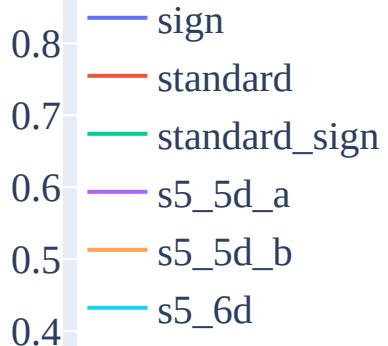

0.8  
0.7  
0.6  
0.5  
0.4  
0.3  
0.2  
0.1  
0

1

2

5

10

2

5

100

2

5

1000

2

5

10k

2

5

100k

2

epoch

Supplement: supplementary_material [file attachment]

observed

sign

+

standard

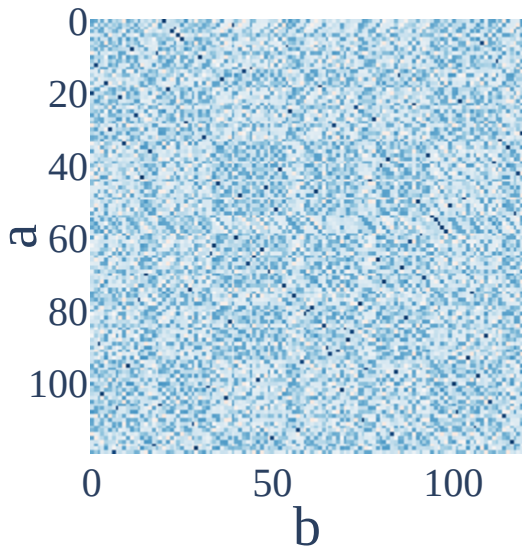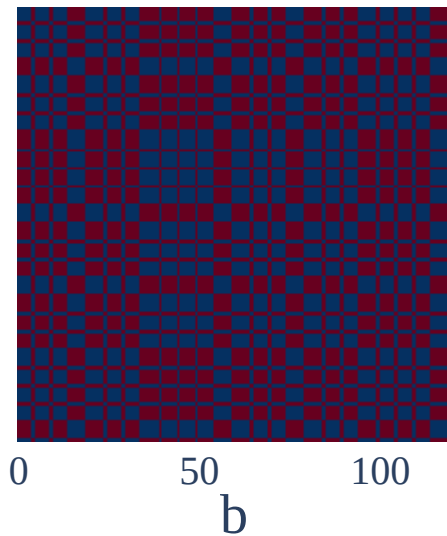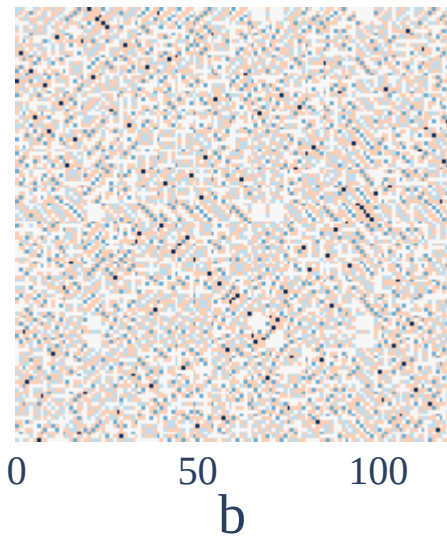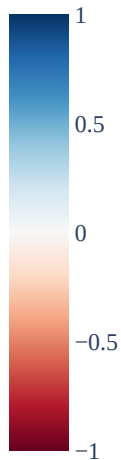

Supplement: supplementary_material [file attachment]

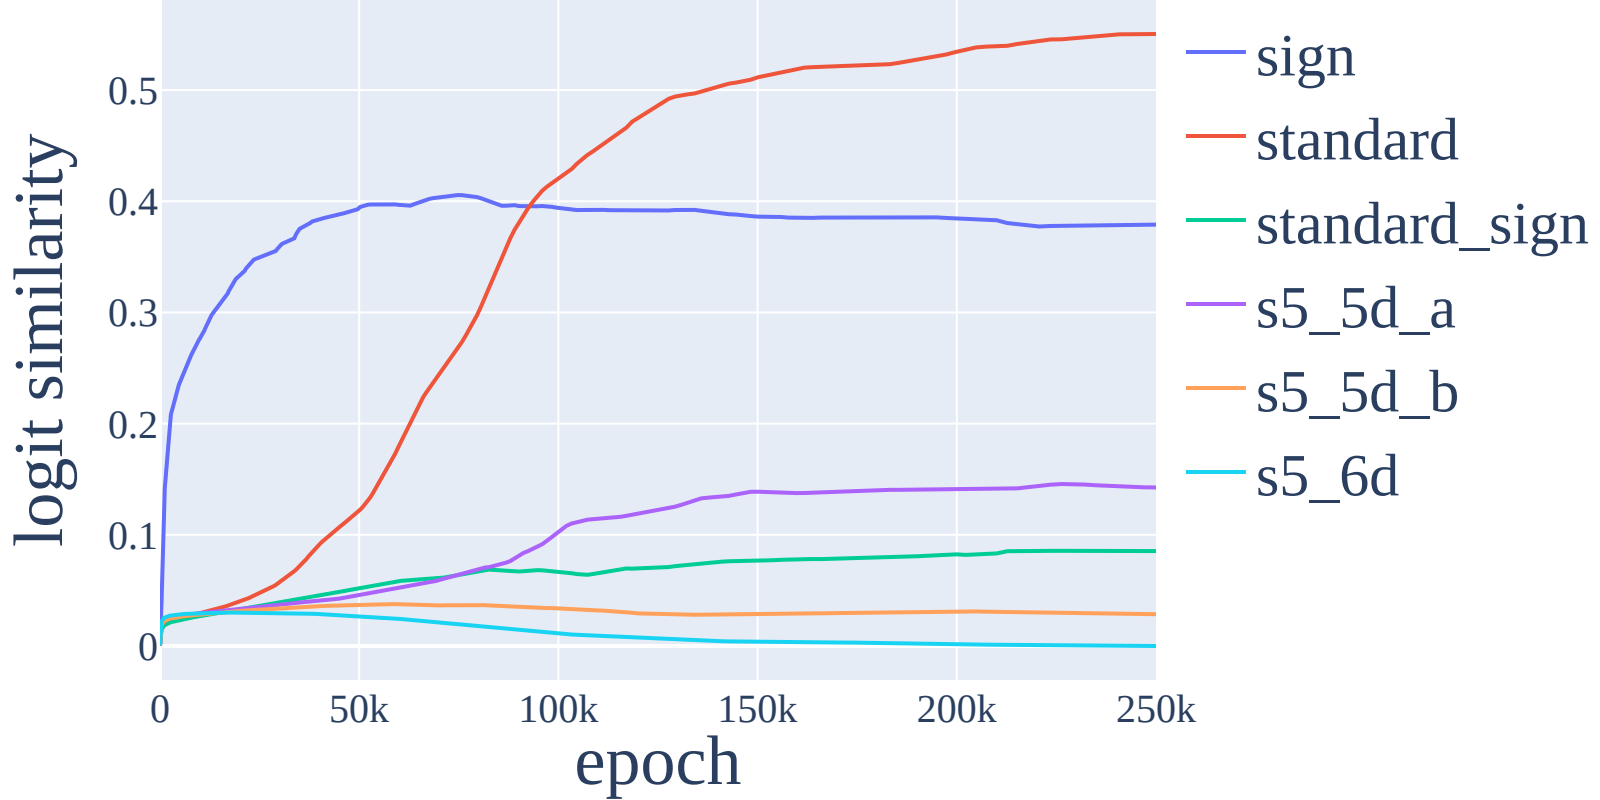

Supplement: supplementary_material [file attachment]

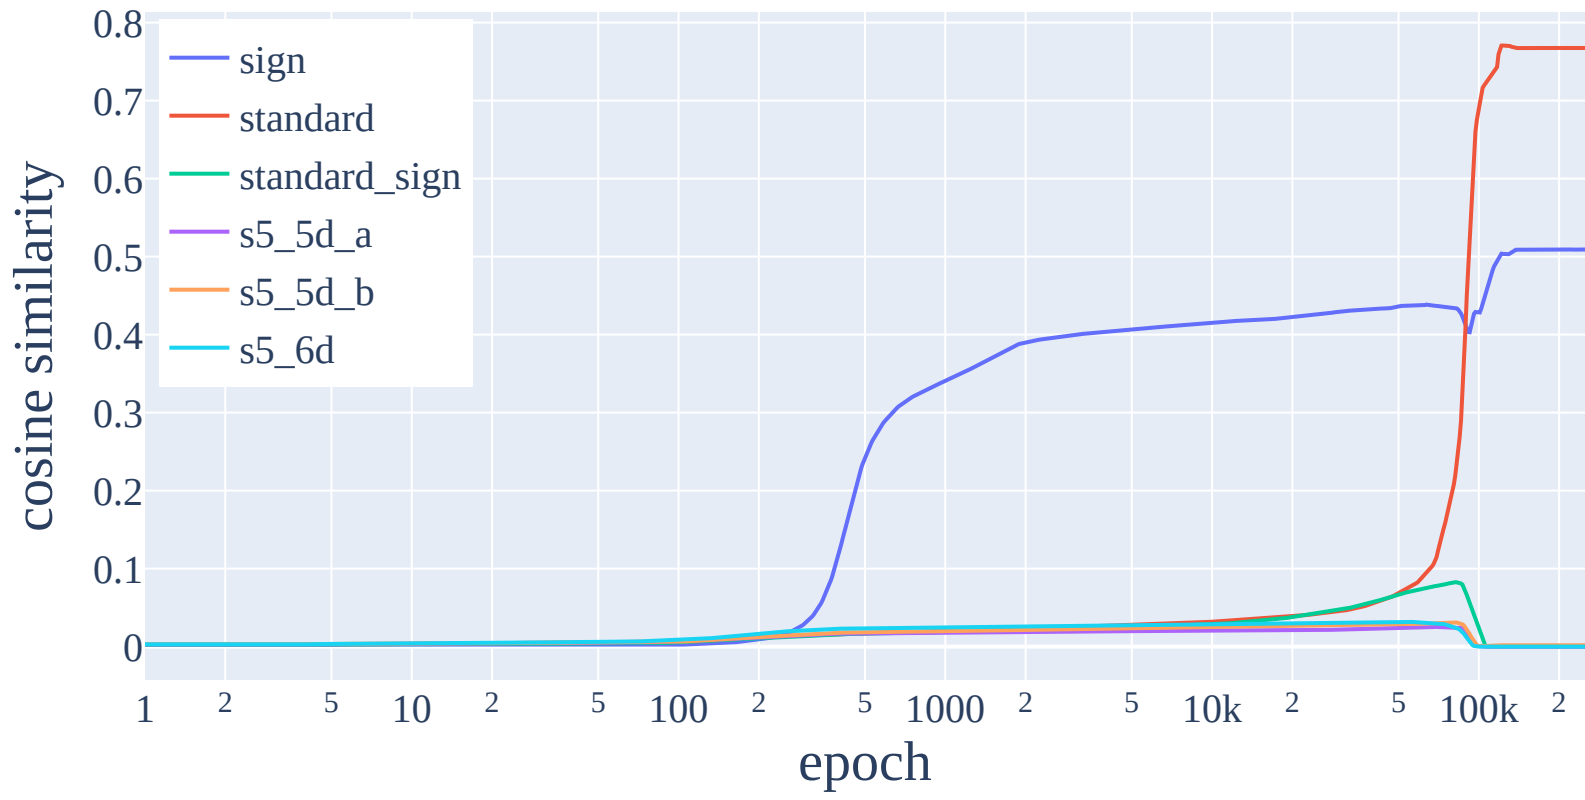

Supplement: supplementary_material [file attachment]

cosine similarity

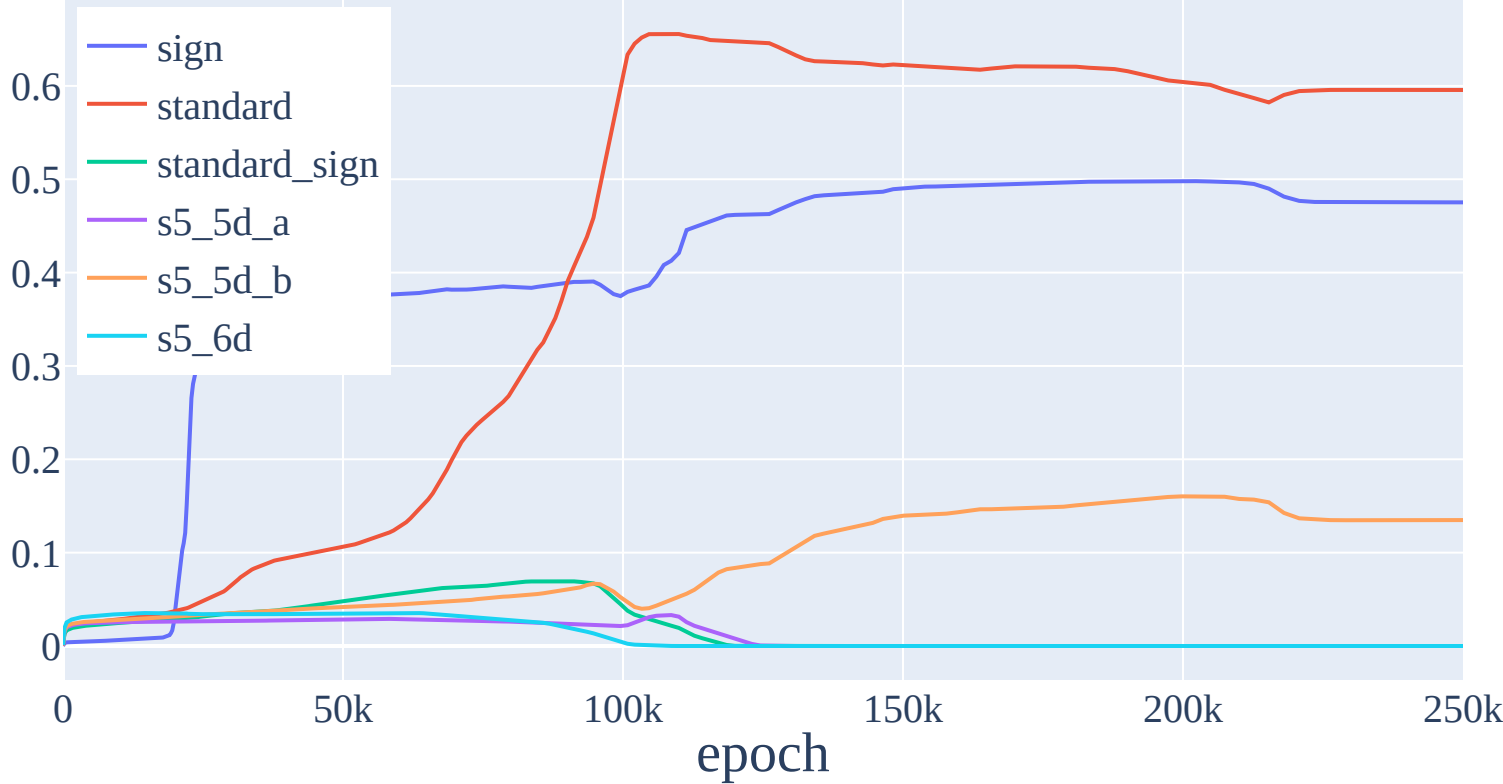

Supplement: supplementary_material [file attachment]

fraction of variance

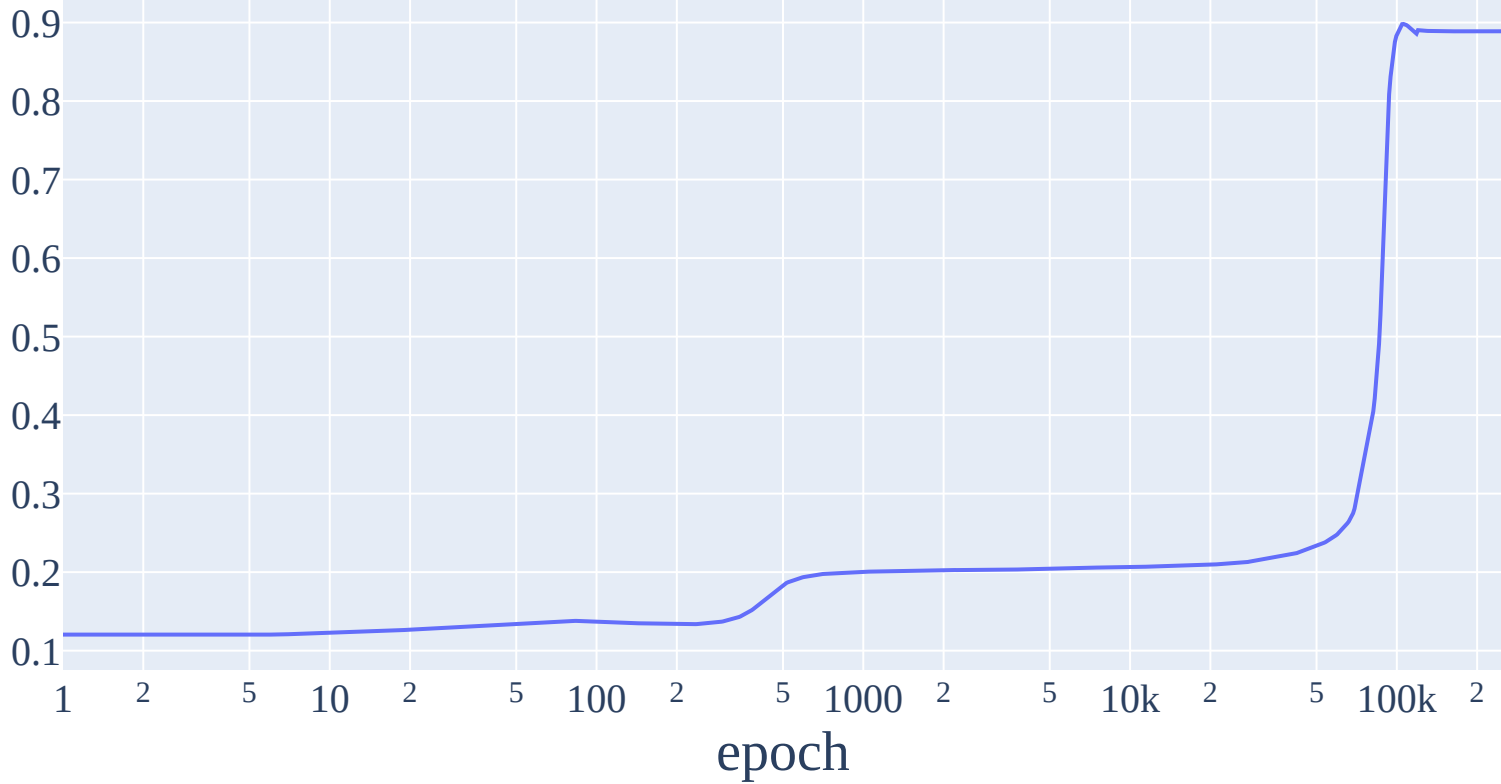

Supplement: supplementary_material [file attachment]

2

8

17

65

111

113

120

a

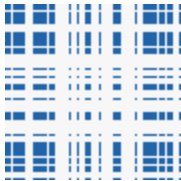

b

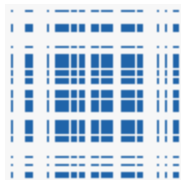

b

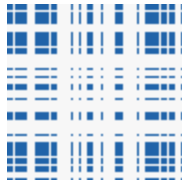

b

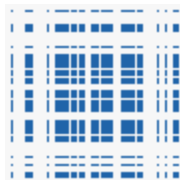

b

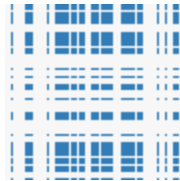

b

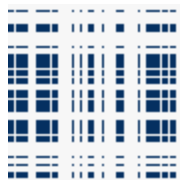

b



b

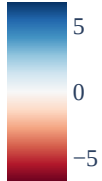

Supplement: supplementary_material [file attachment]

fraction of variance

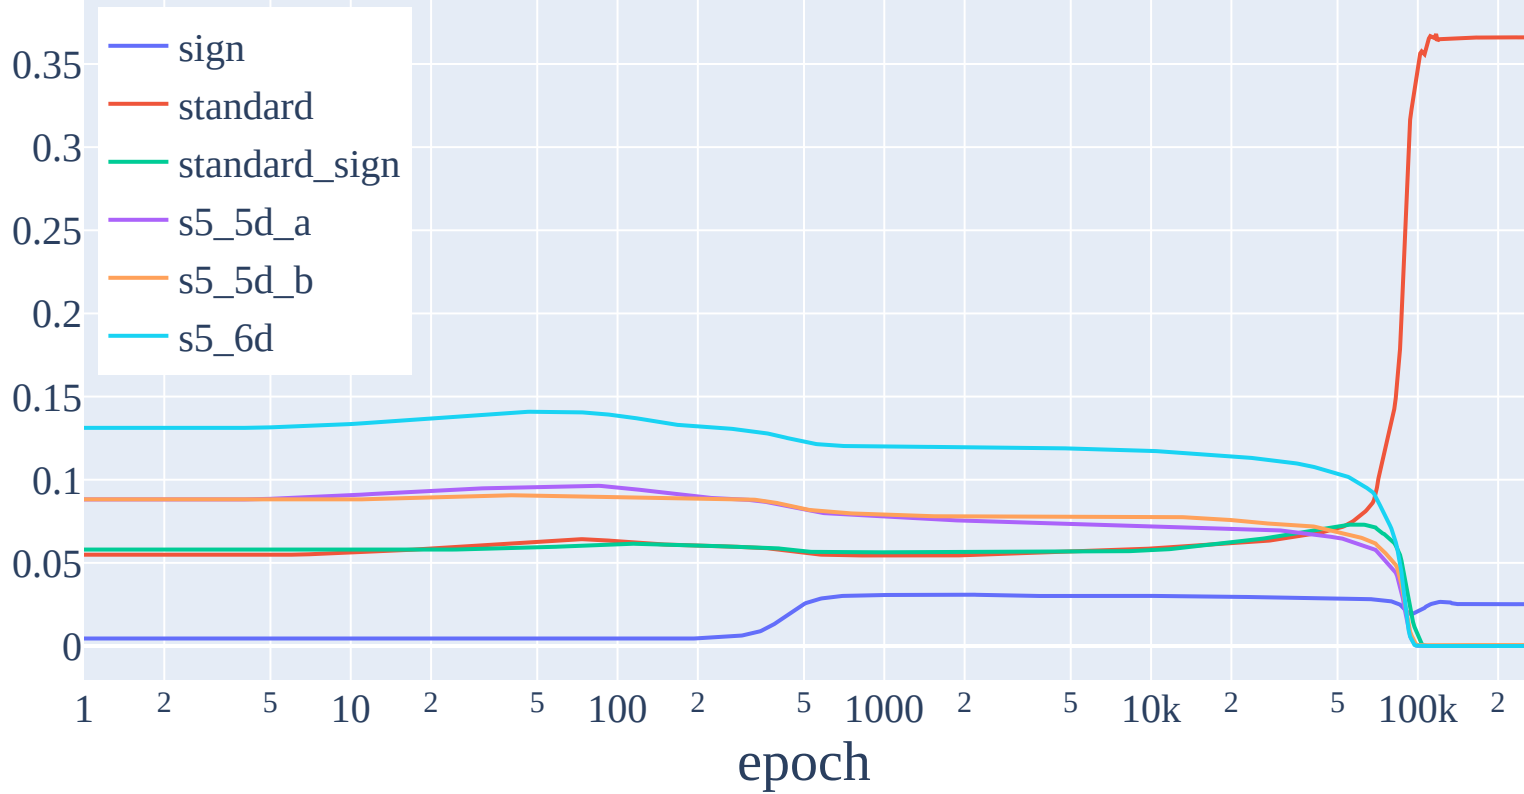

Supplement: supplementary_material [file attachment]

fraction of variance

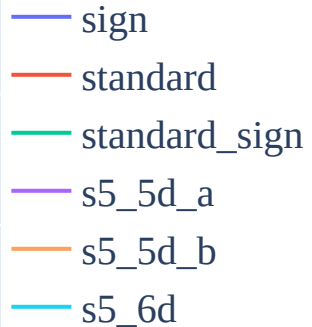

0.8  
0.6  
0.4  
0.2  
0

1 2 5 10 2 5 100 2 5 1000 2 5 10k 2 5 100k 2

epoch

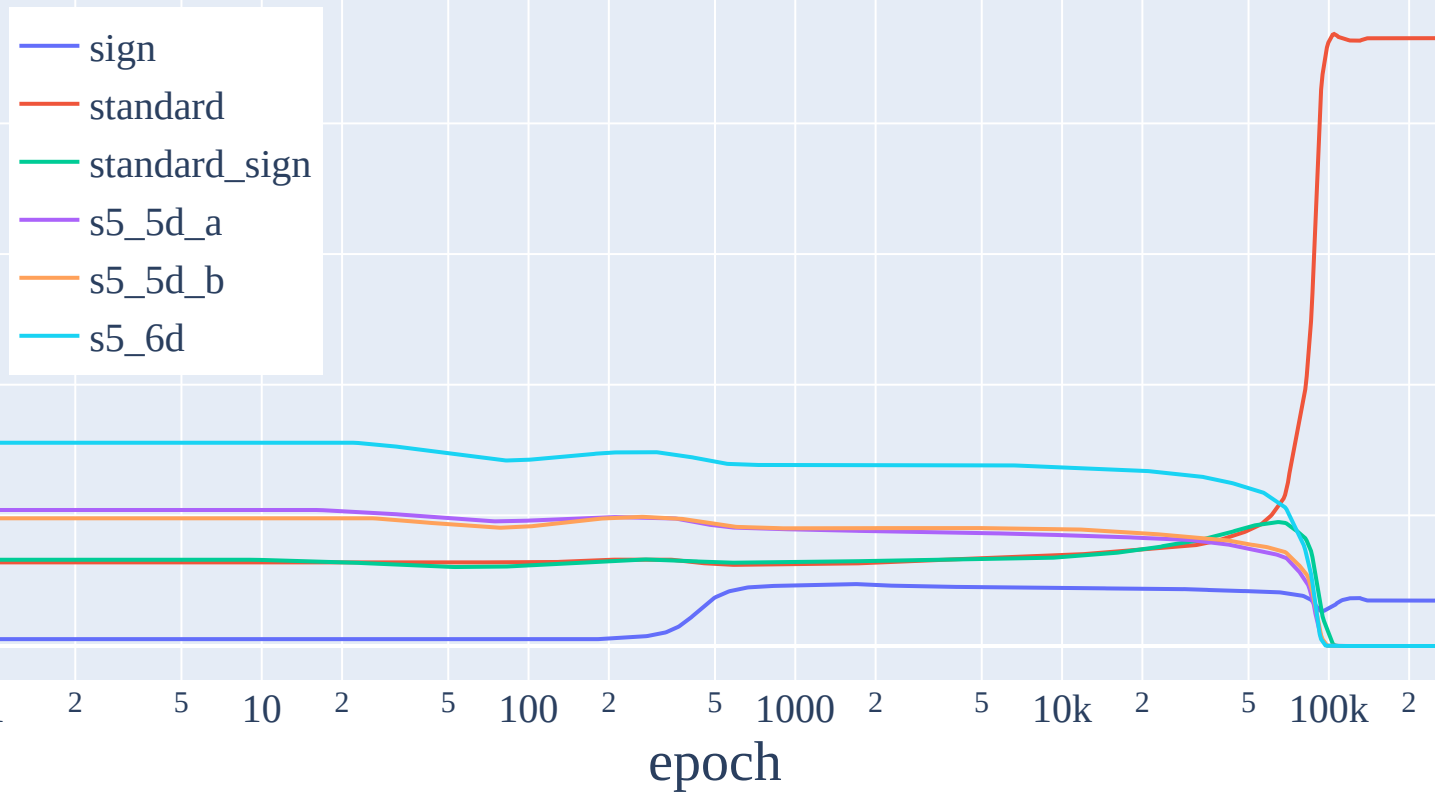

Supplement: supplementary_material [file attachment]

representation

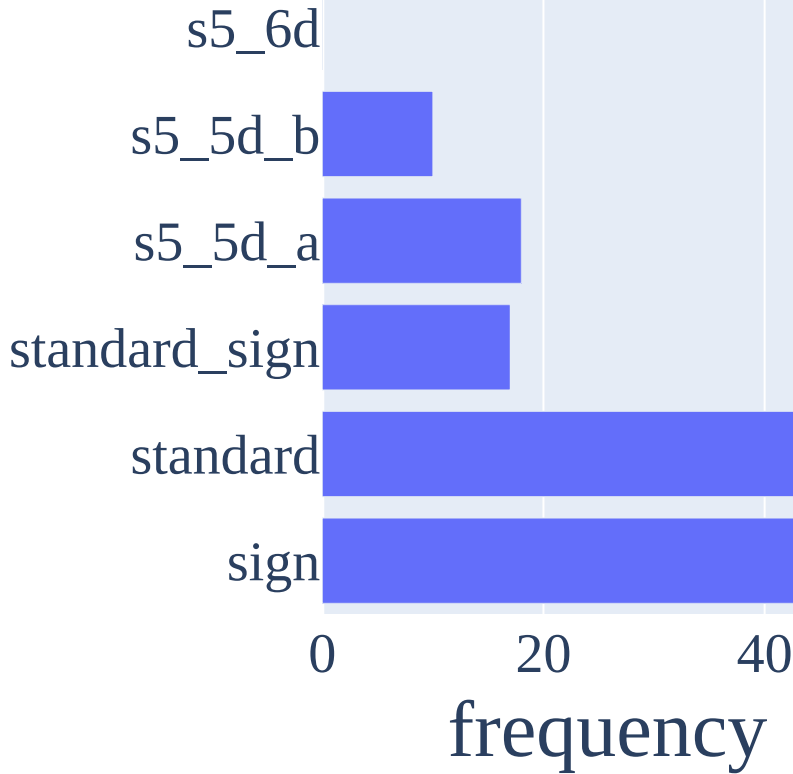

Supplement: supplementary_material [file attachment]

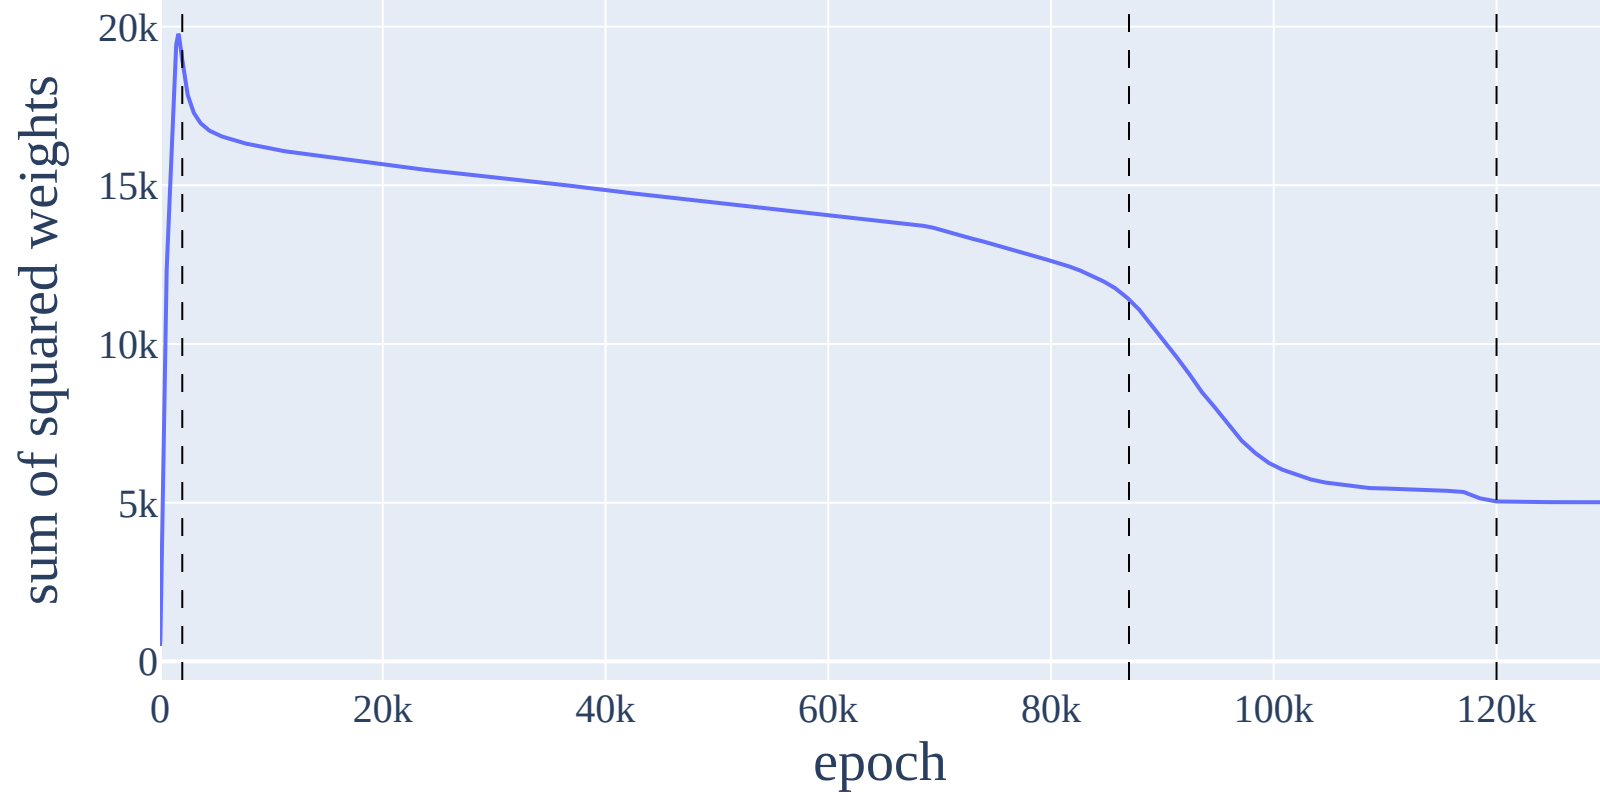

Supplement: supplementary_material [file attachment]

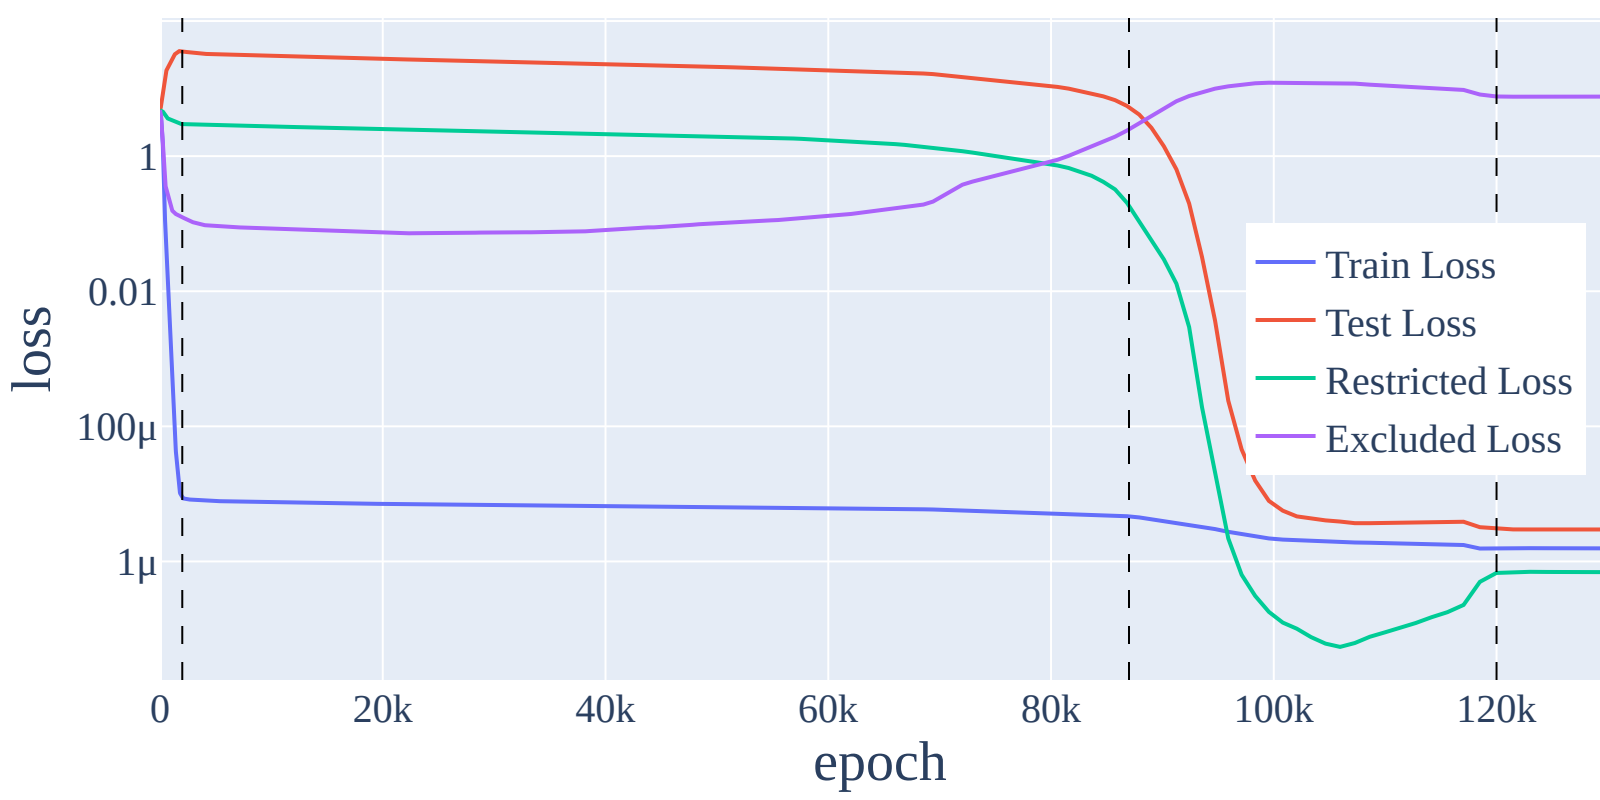

Supplement: supplementary_material [file attachment]

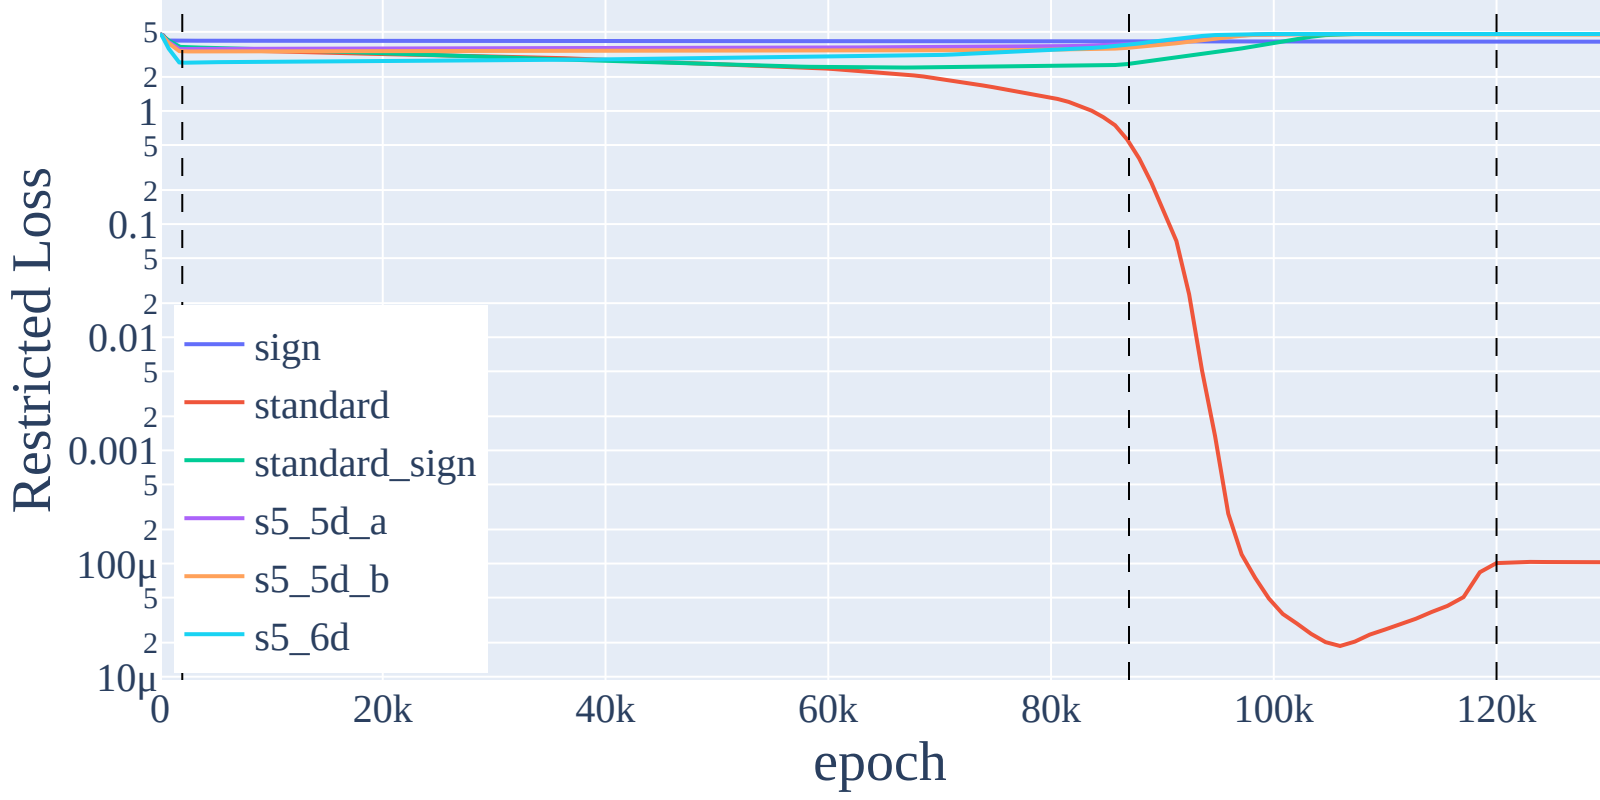

Supplement: supplementary_material [file attachment]

# key reps

6  
5  
4  
3  
2  
1  
0

0

5

10

15

20

frequency

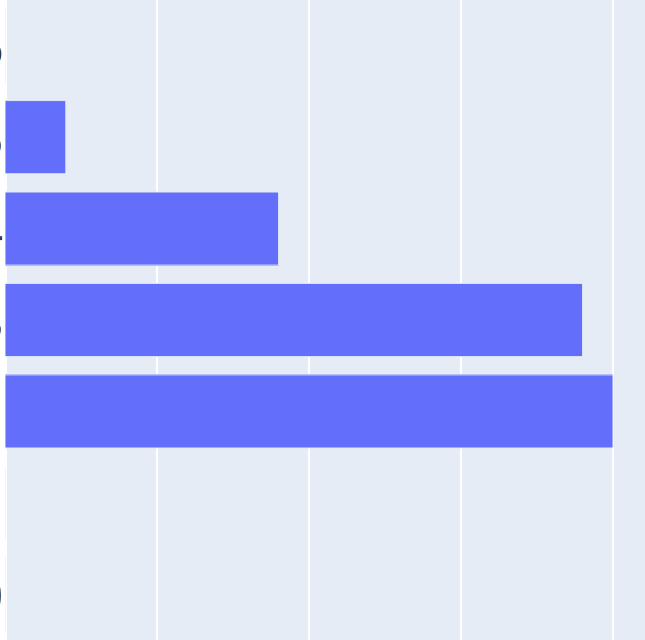

Supplement: supplementary_material [file attachment]

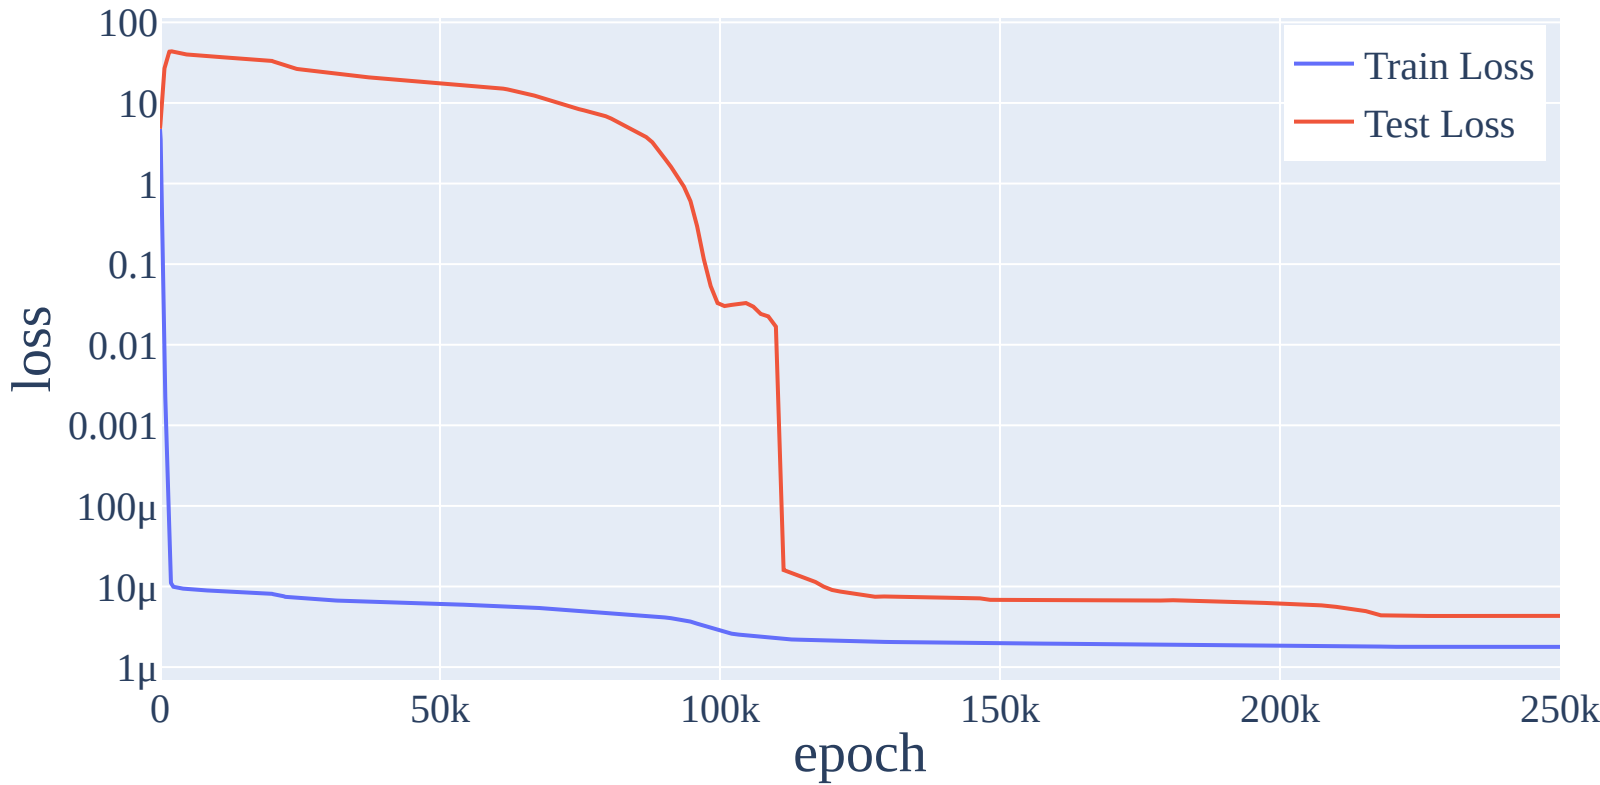

Supplement: supplementary_material [file attachment]

fraction of variance

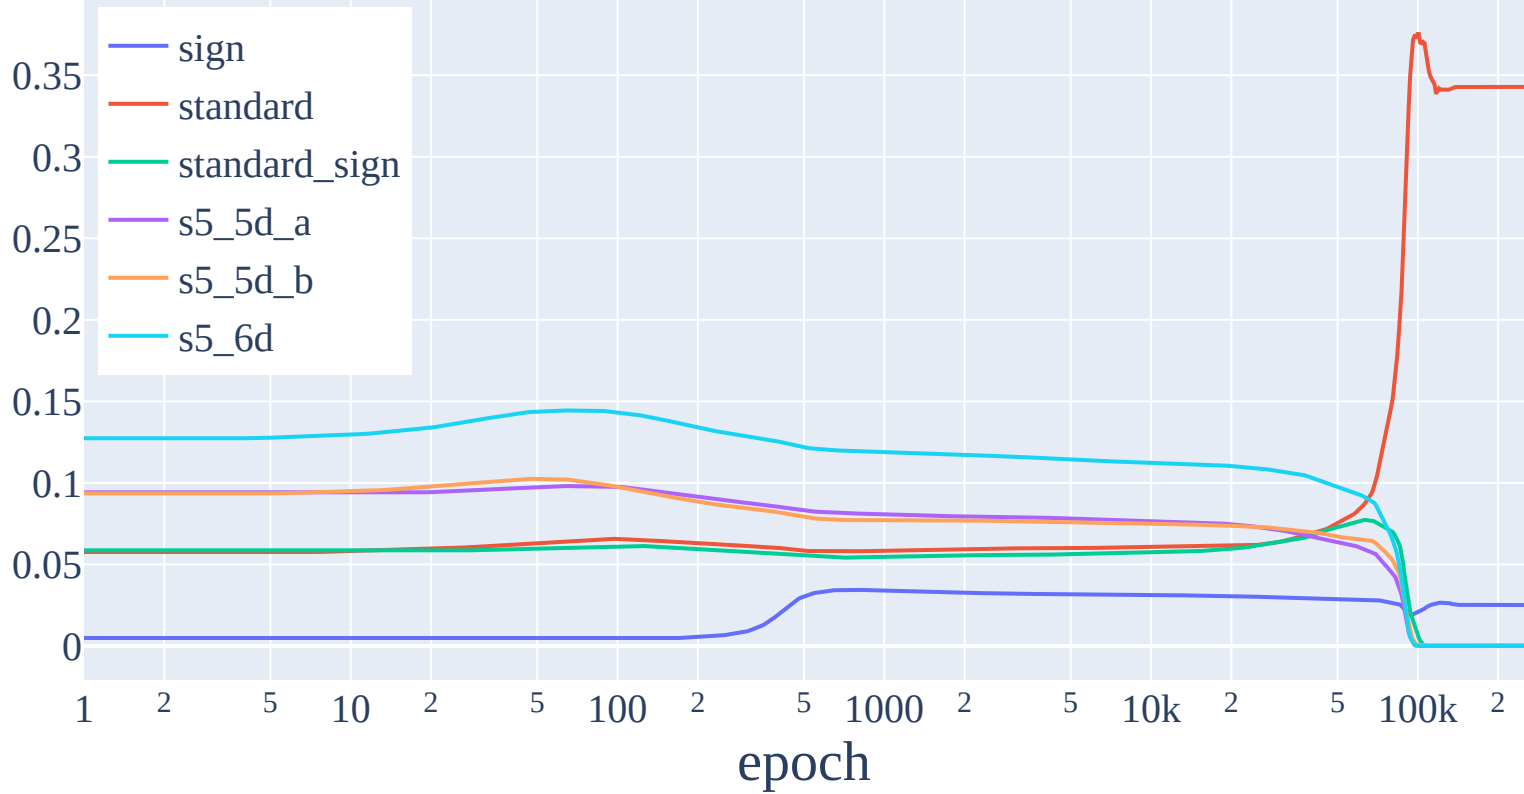

Supplement: supplementary_material [file attachment]

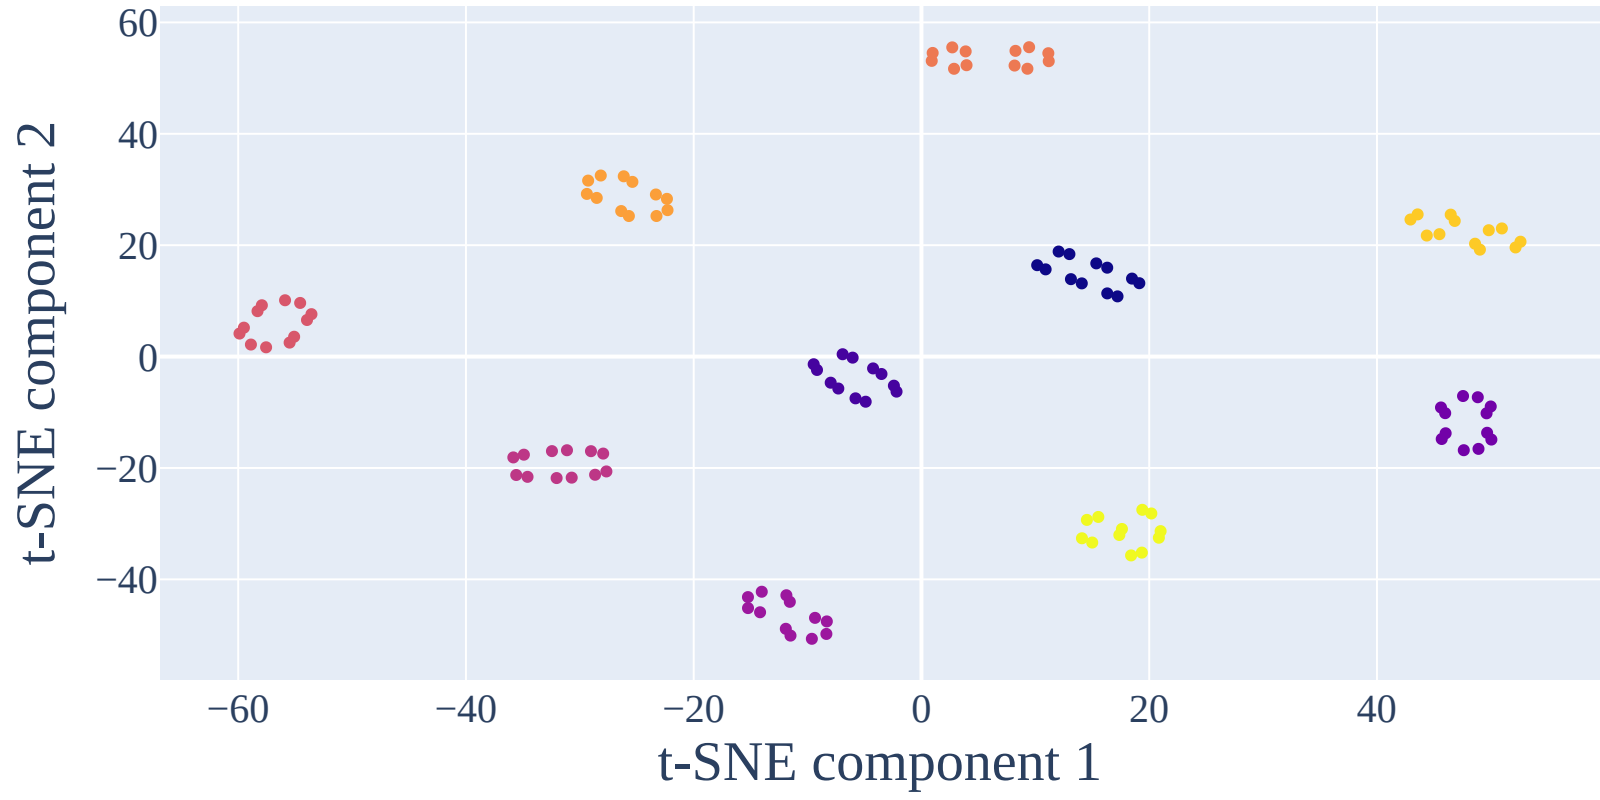

Supplement: supplementary_material [file attachment]

fraction of variance

- sign
- standard
- standard\_sign
- s5\_5d\_a
- s5\_5d\_b
- s5\_6d

0.1  
0.08  
0.06  
0.04  
0.02  
0

epoch

1 2 5 10 2 5 100 2 5 1000 2 5 10k 2 5 100k 2

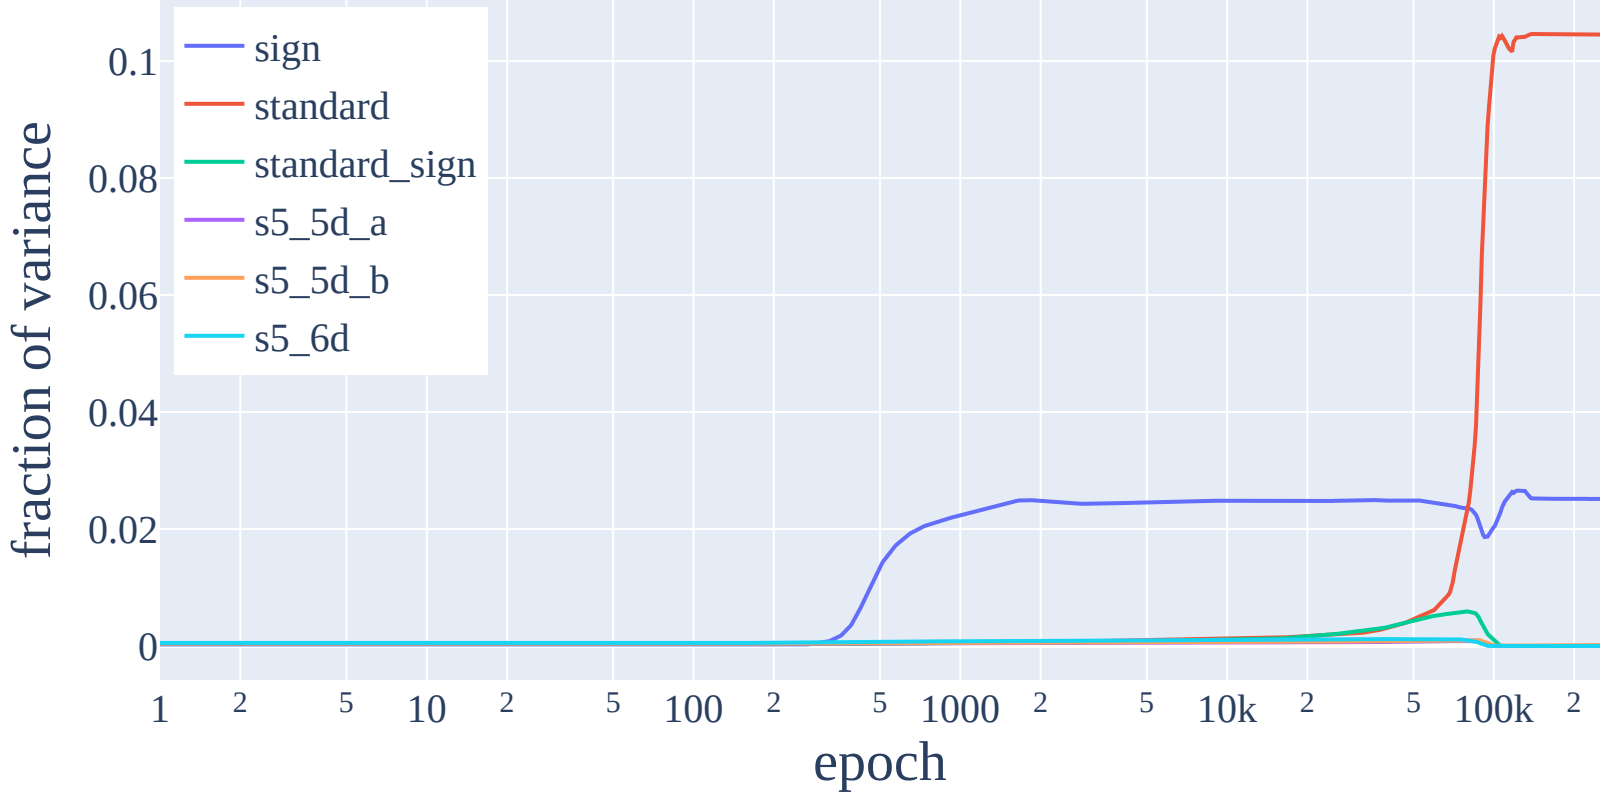

Supplement: supplementary_material [file attachment]

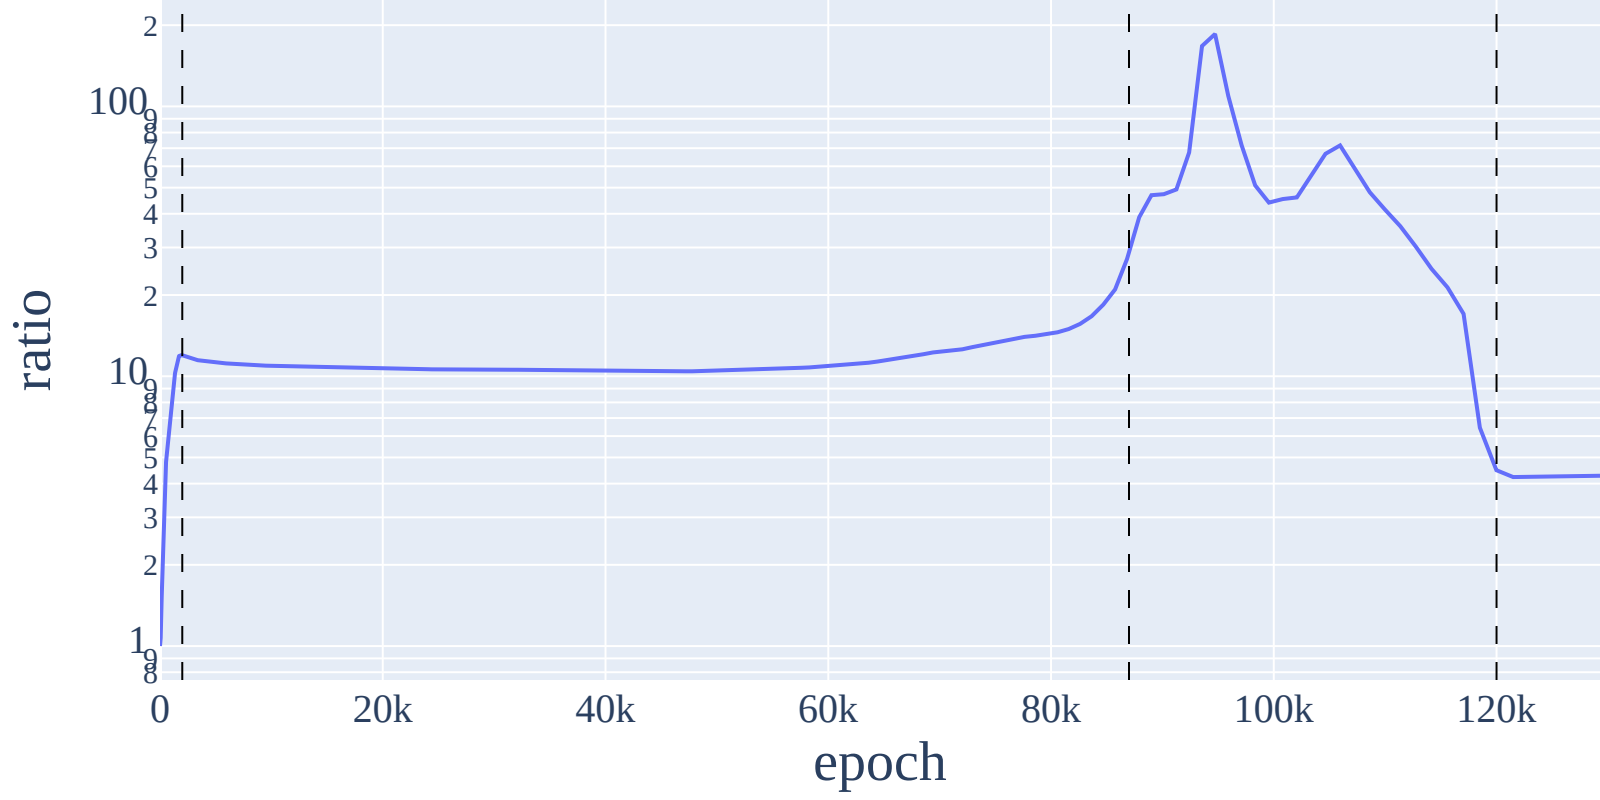

Supplement: supplementary_material [file attachment]

fraction of variance



0.8  
0.6  
0.4  
0.2  
0

1 2 5 10 2 5 100 2 5 1000 2 5 10k 2 5 100k 2

epoch

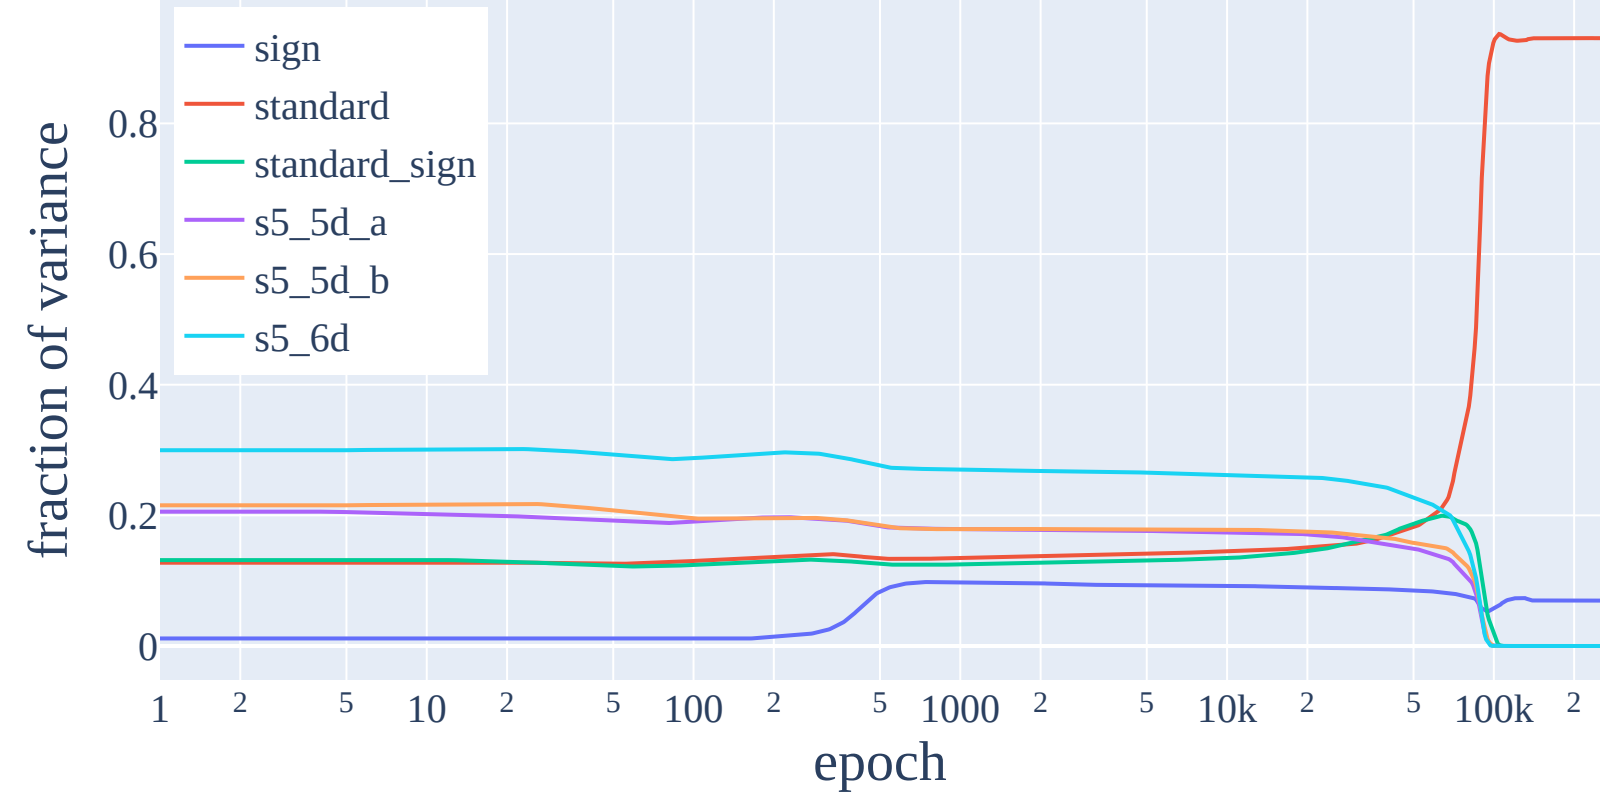

Supplement: supplementary_material [file attachment]

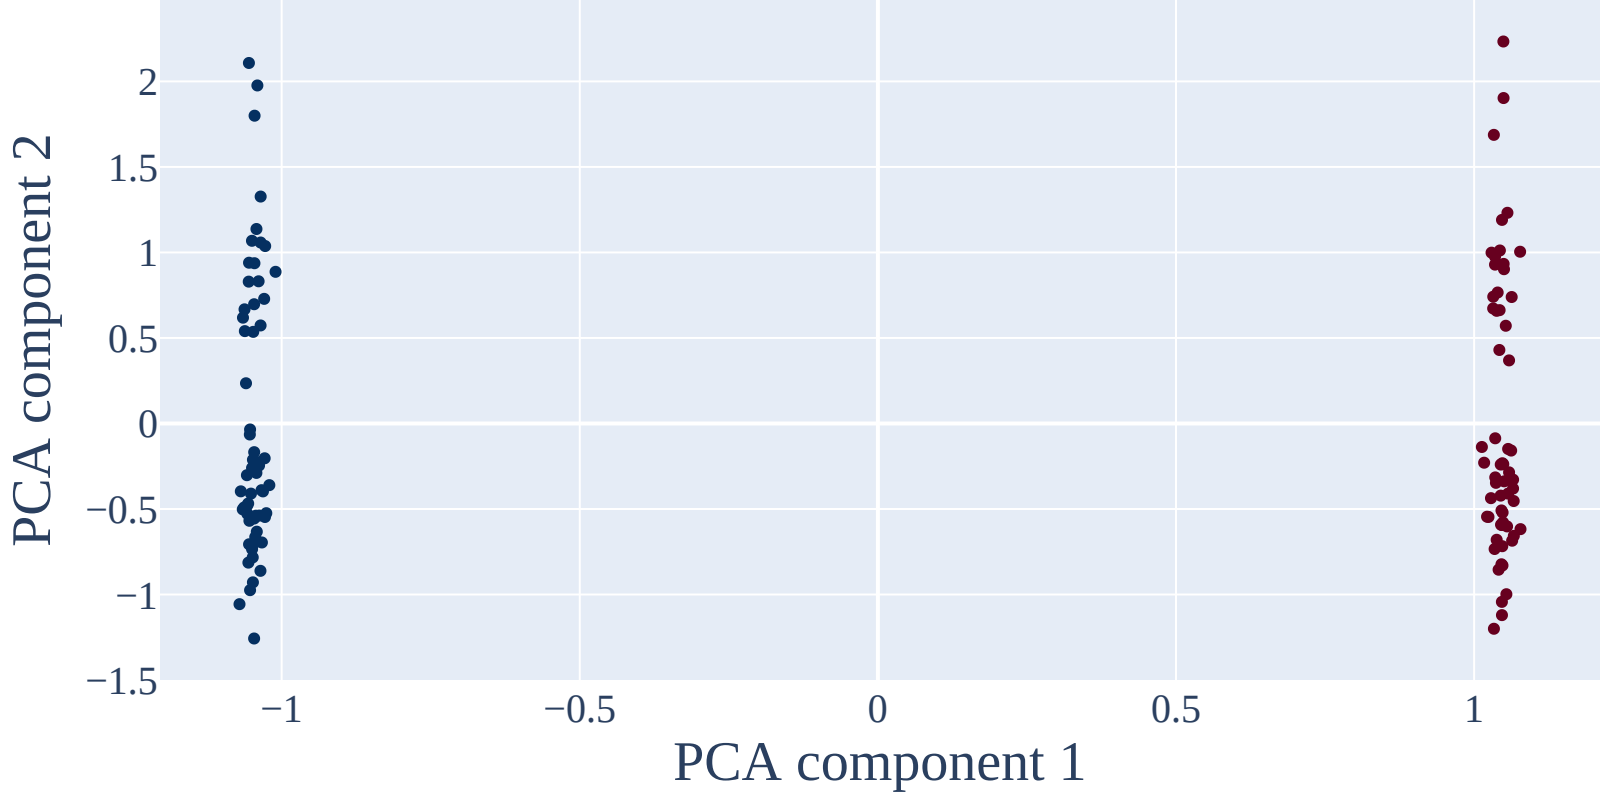

Supplement: supplementary_material [file attachment]

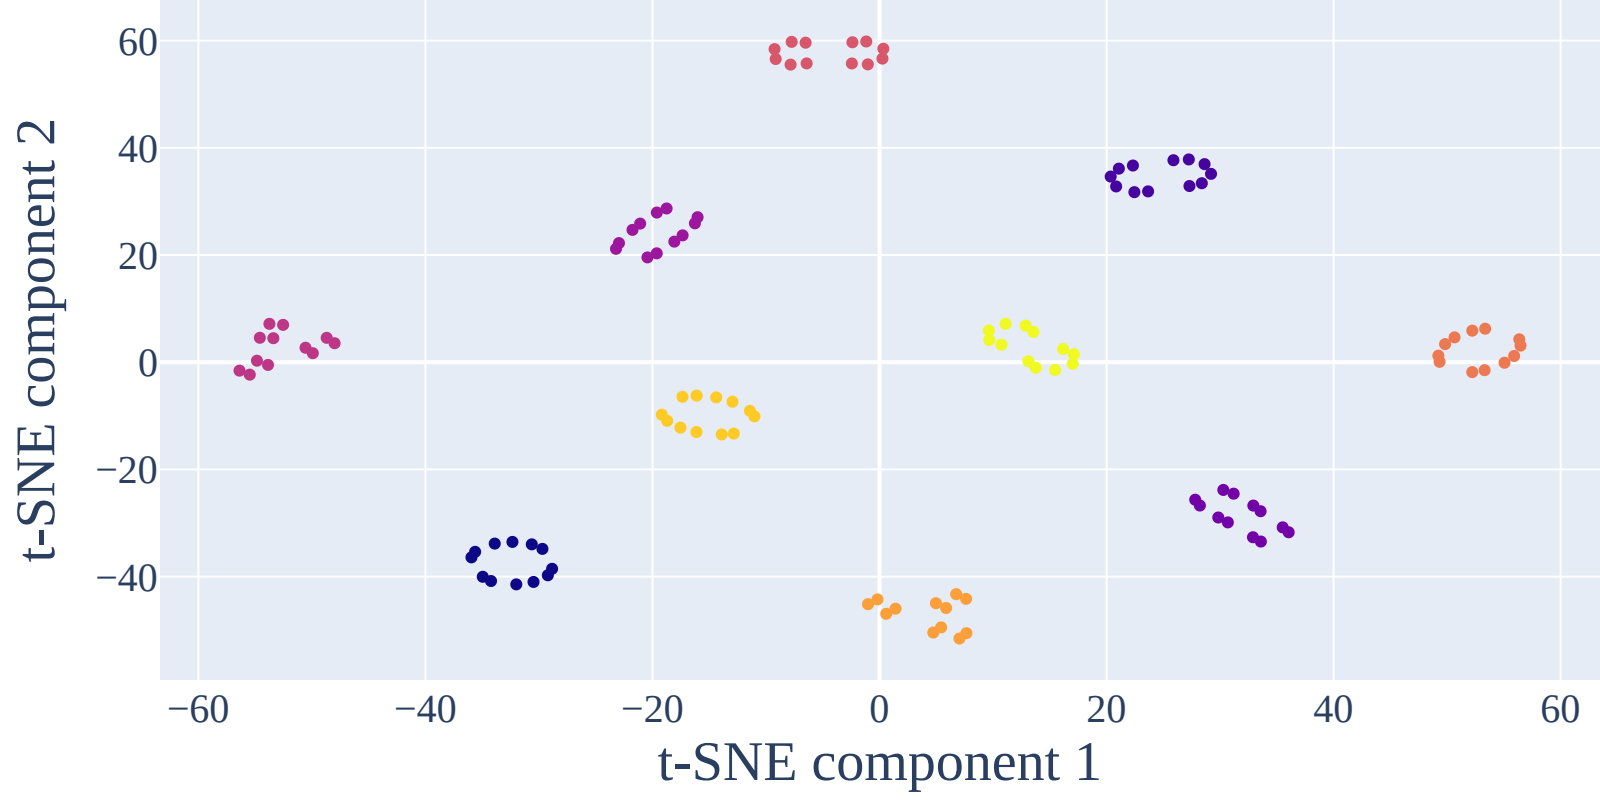

Supplement: supplementary_material [file attachment]

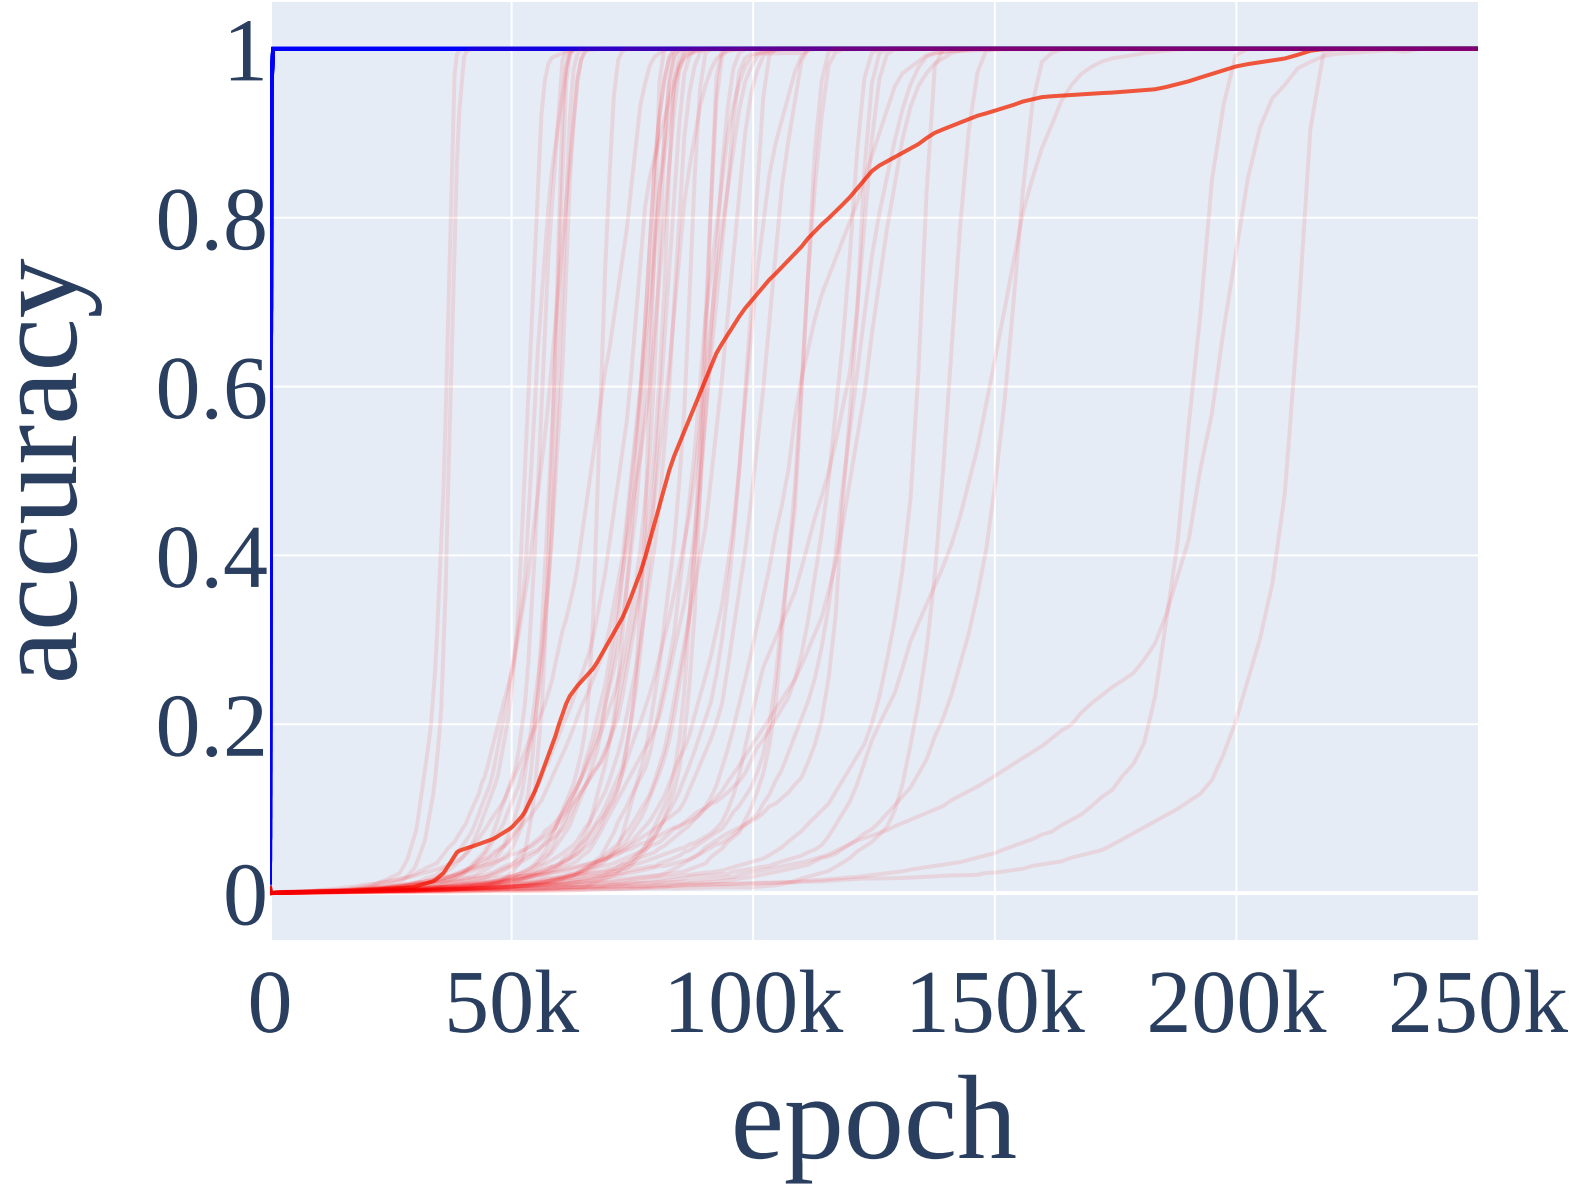

Supplement: supplementary_material [file attachment]

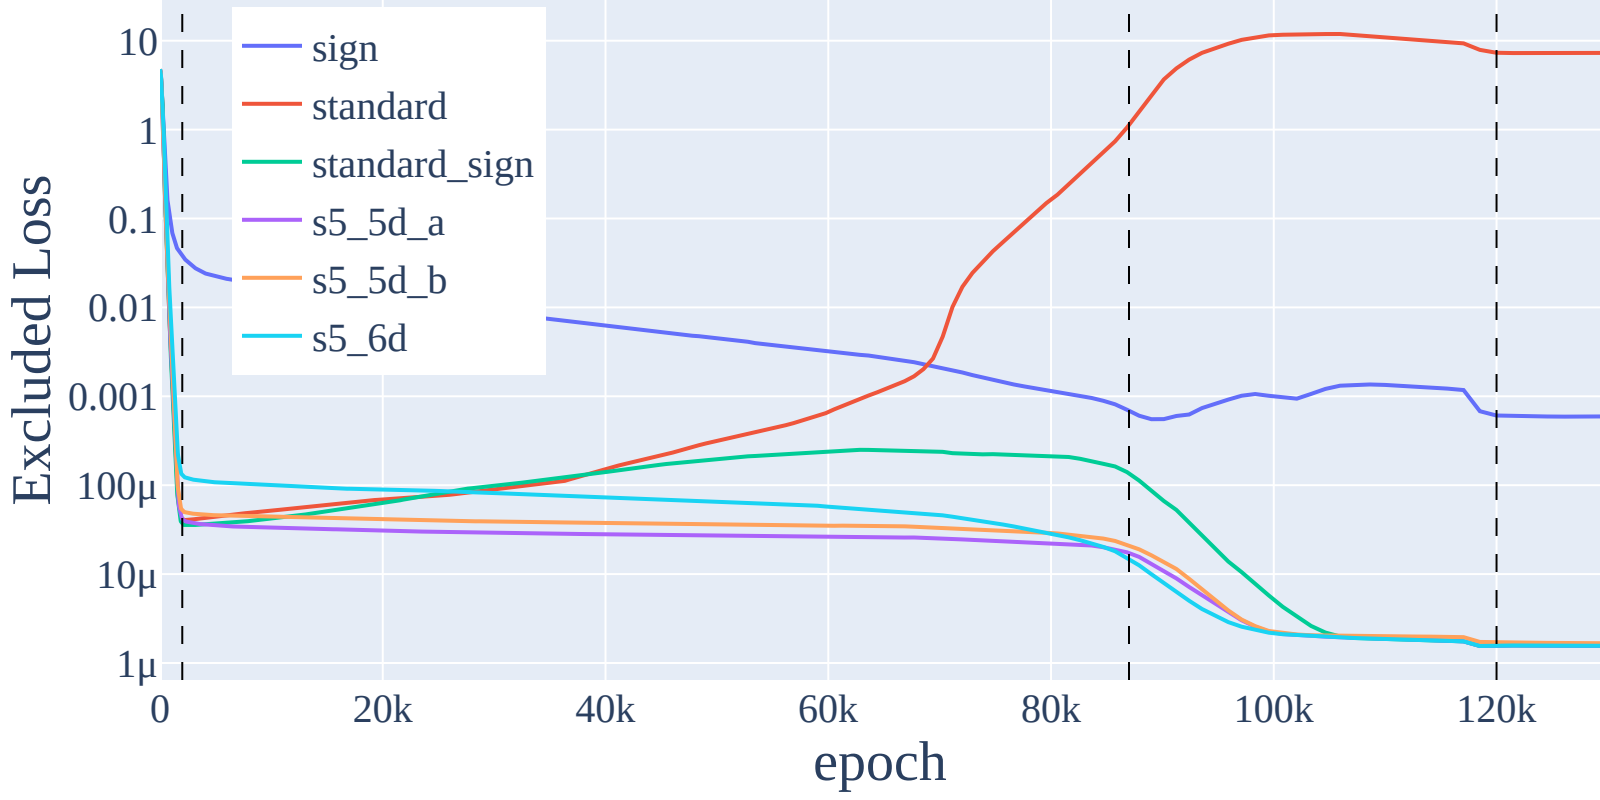

Supplement: supplementary_material [file attachment]
